# Supplementary material for: Methods Used in the Development of Common Data Models for Health Data: Scoping Review
Source: PubMed Central journal article supplement (PMC10436118; doi:10.2196/45116), 2023-08-03
Supplement: medinform_v11i1e45116_app5.pdf [file medinform_v11i1e45116_app5.pdf]

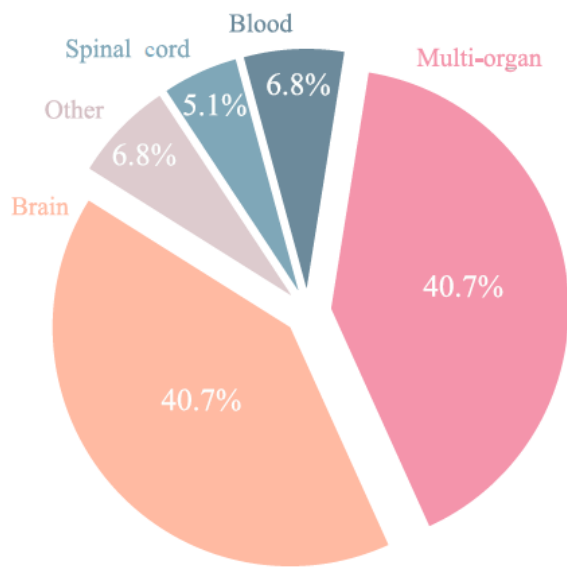

Figure S1

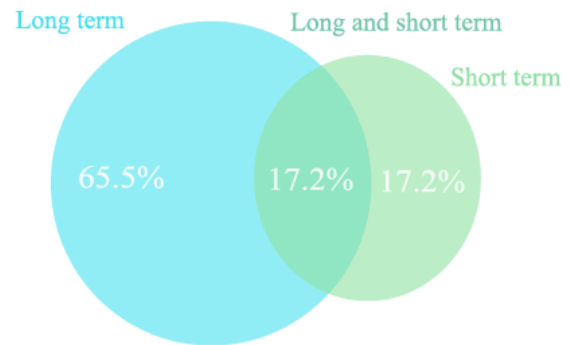

Figure S2

**Multimedia Appendix 5.** Characteristics of the included studies. Figure S1: A pie chart categorizing the medical conditions from the articles according to the organ that the condition usually affects. Figure S2: A Venn diagram showing the percentage of long-term versus short-term conditions and those that could be considered long term or short term.
