# Supplementary material for: Methods Used in the Development of Common Data Models for Health Data: Scoping Review
Source: PubMed Central journal article supplement (PMC10436118; doi:10.2196/45116), 2023-08-03
Supplement: medinform_v11i1e45116_app6.pdf [file medinform_v11i1e45116_app6.pdf]

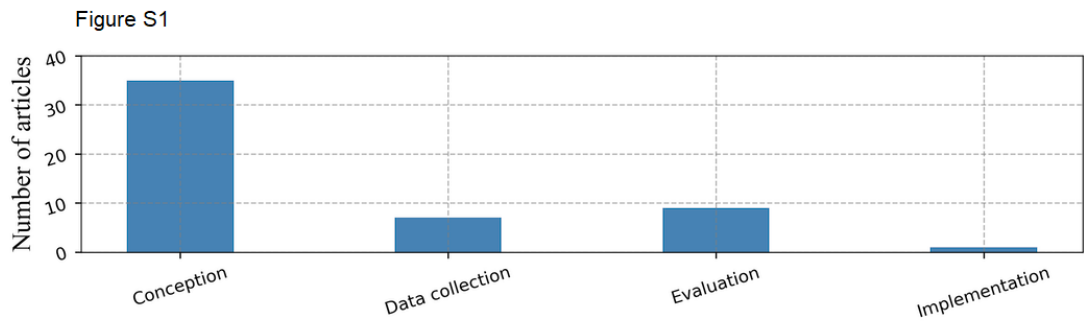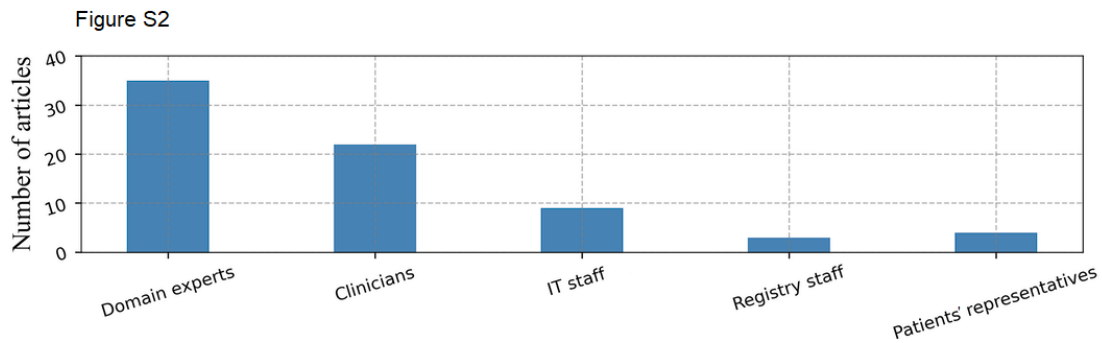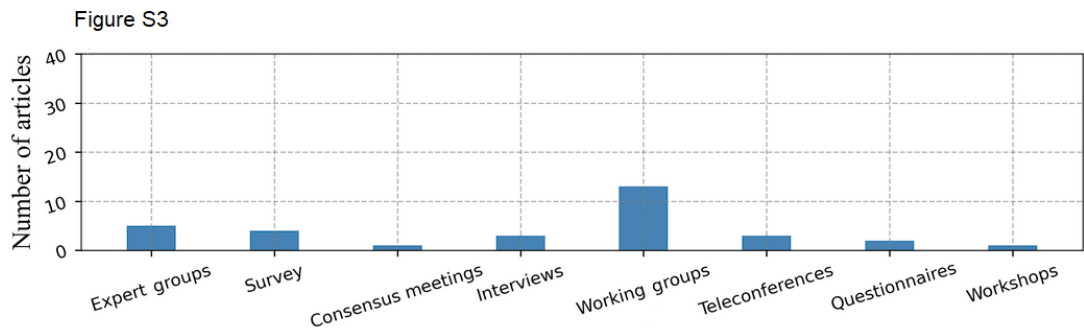

**Multimedia Appendix 6.** Summary of derived stakeholder information. Figure S1: Steps of the design process in which stakeholders were involved. In most articles, stakeholders were involved for the first time during the conception phase. Figure S2: Stakeholders who were involved in the design process itself. Figure S3: Nature of stakeholder involvement (eg, via a questionnaire or online survey).
